# Supplementary material for: Novel α-Amylase Inhibitor Hemi-pyocyanin Produced by Microbial Conversion of Chitinous Discards
Source: Preprints.org preprint supplement (doi:10.20944/preprints202203.0405.v1), 2022-03-31
Supplement: Supplementary file 1 [file supplementary]

**Supplementary materials:**

RT:

0.00 - 17.00

2

4

6

8

10

12

14

16

Time (min)

0

10

20

30

40

50

60

70

80

90

100

Relative Abundance

13.09


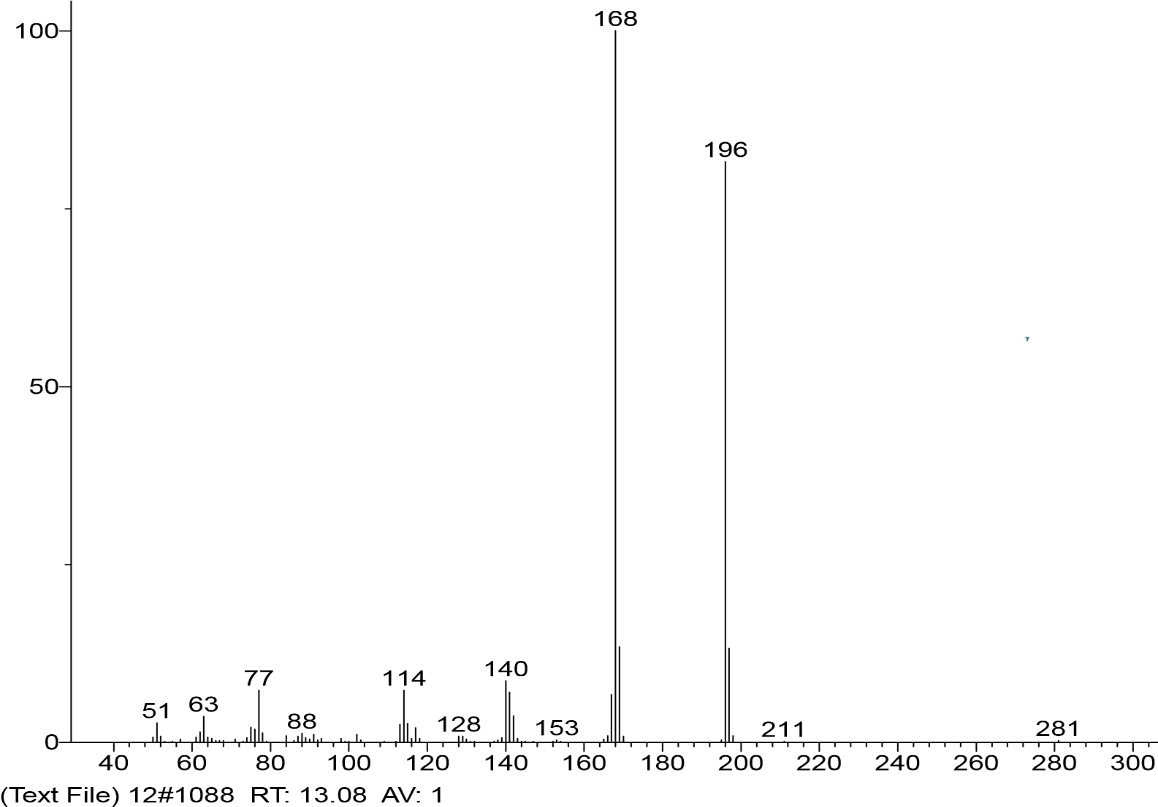


**A**

**B**

**Figure S1.** The gas chromatography-mass spectrometry **(**GCMS) profile of purified compound SF-1. The GC profile (**A**) and MS profile (**B**).


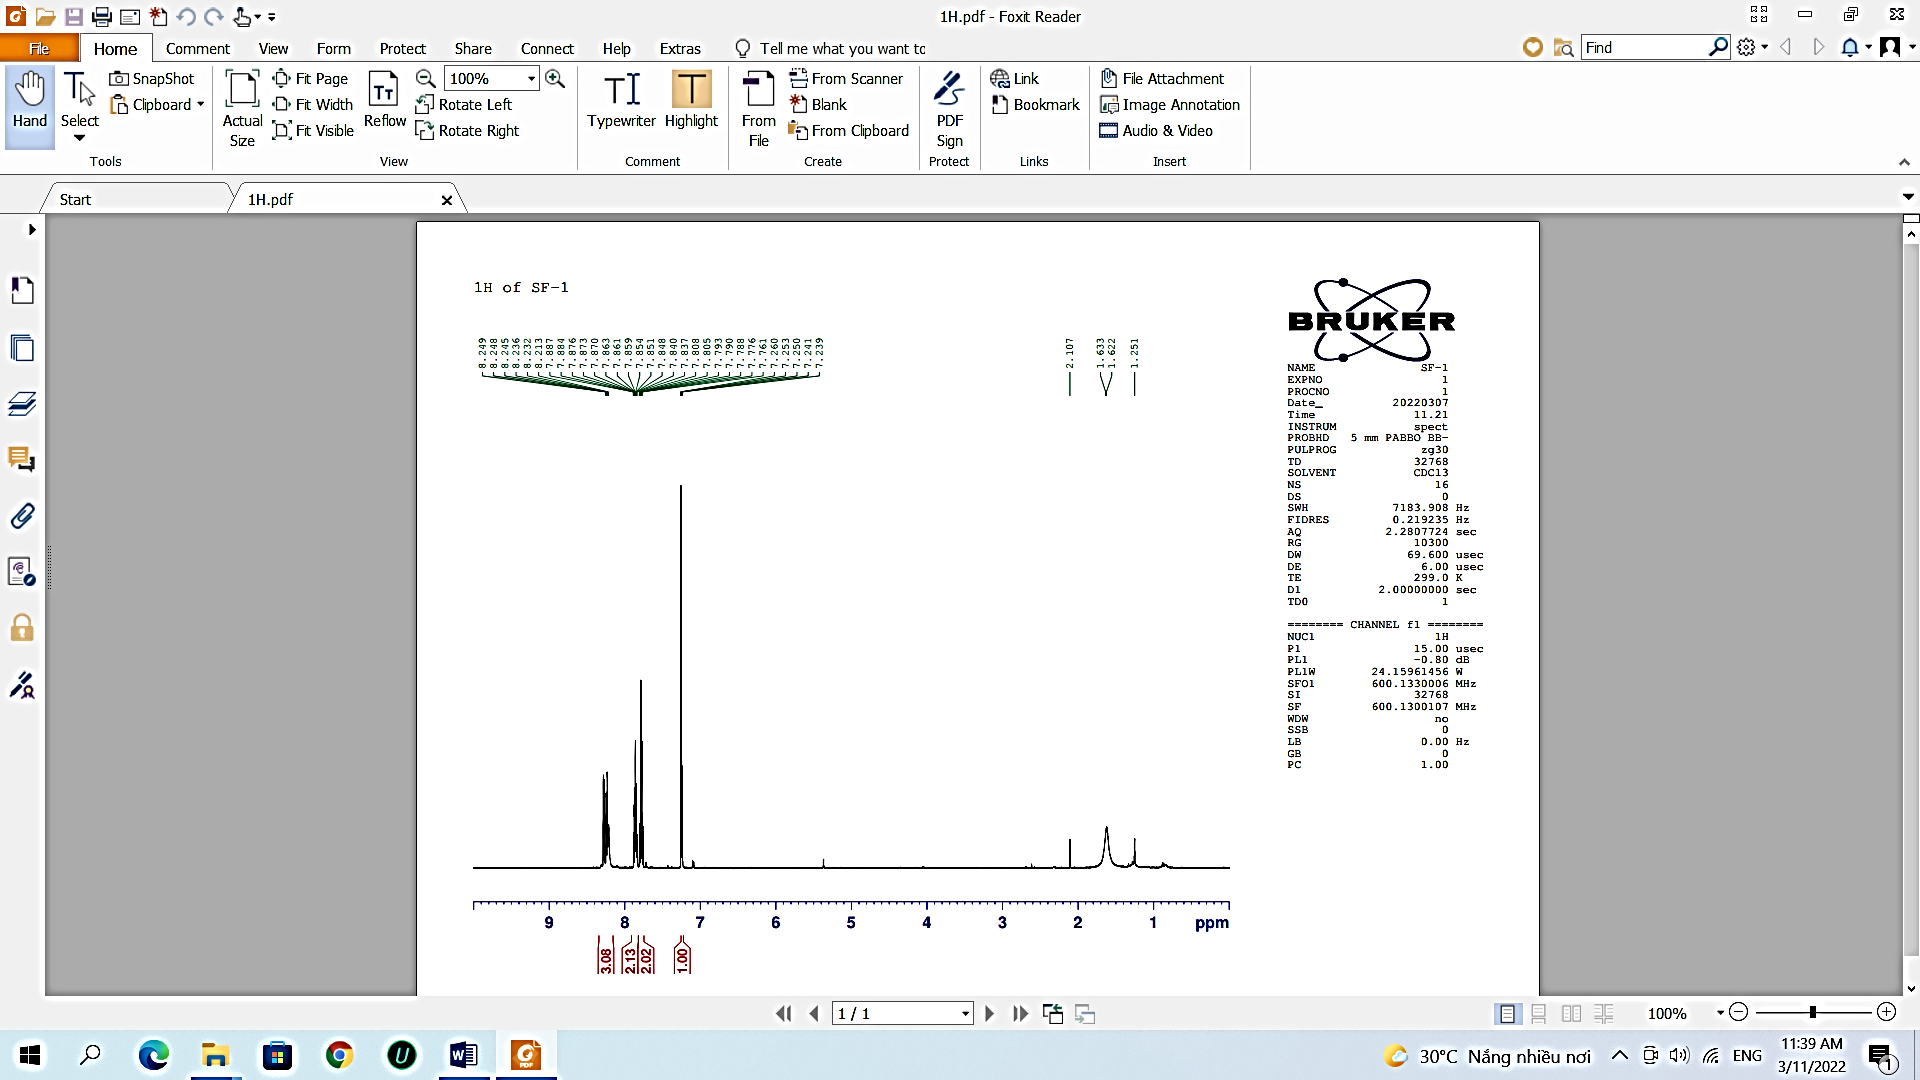


**Figure S2.** 1H NMR spectrum of compound SF-1, measured in CDCl3 at 600 MHz.


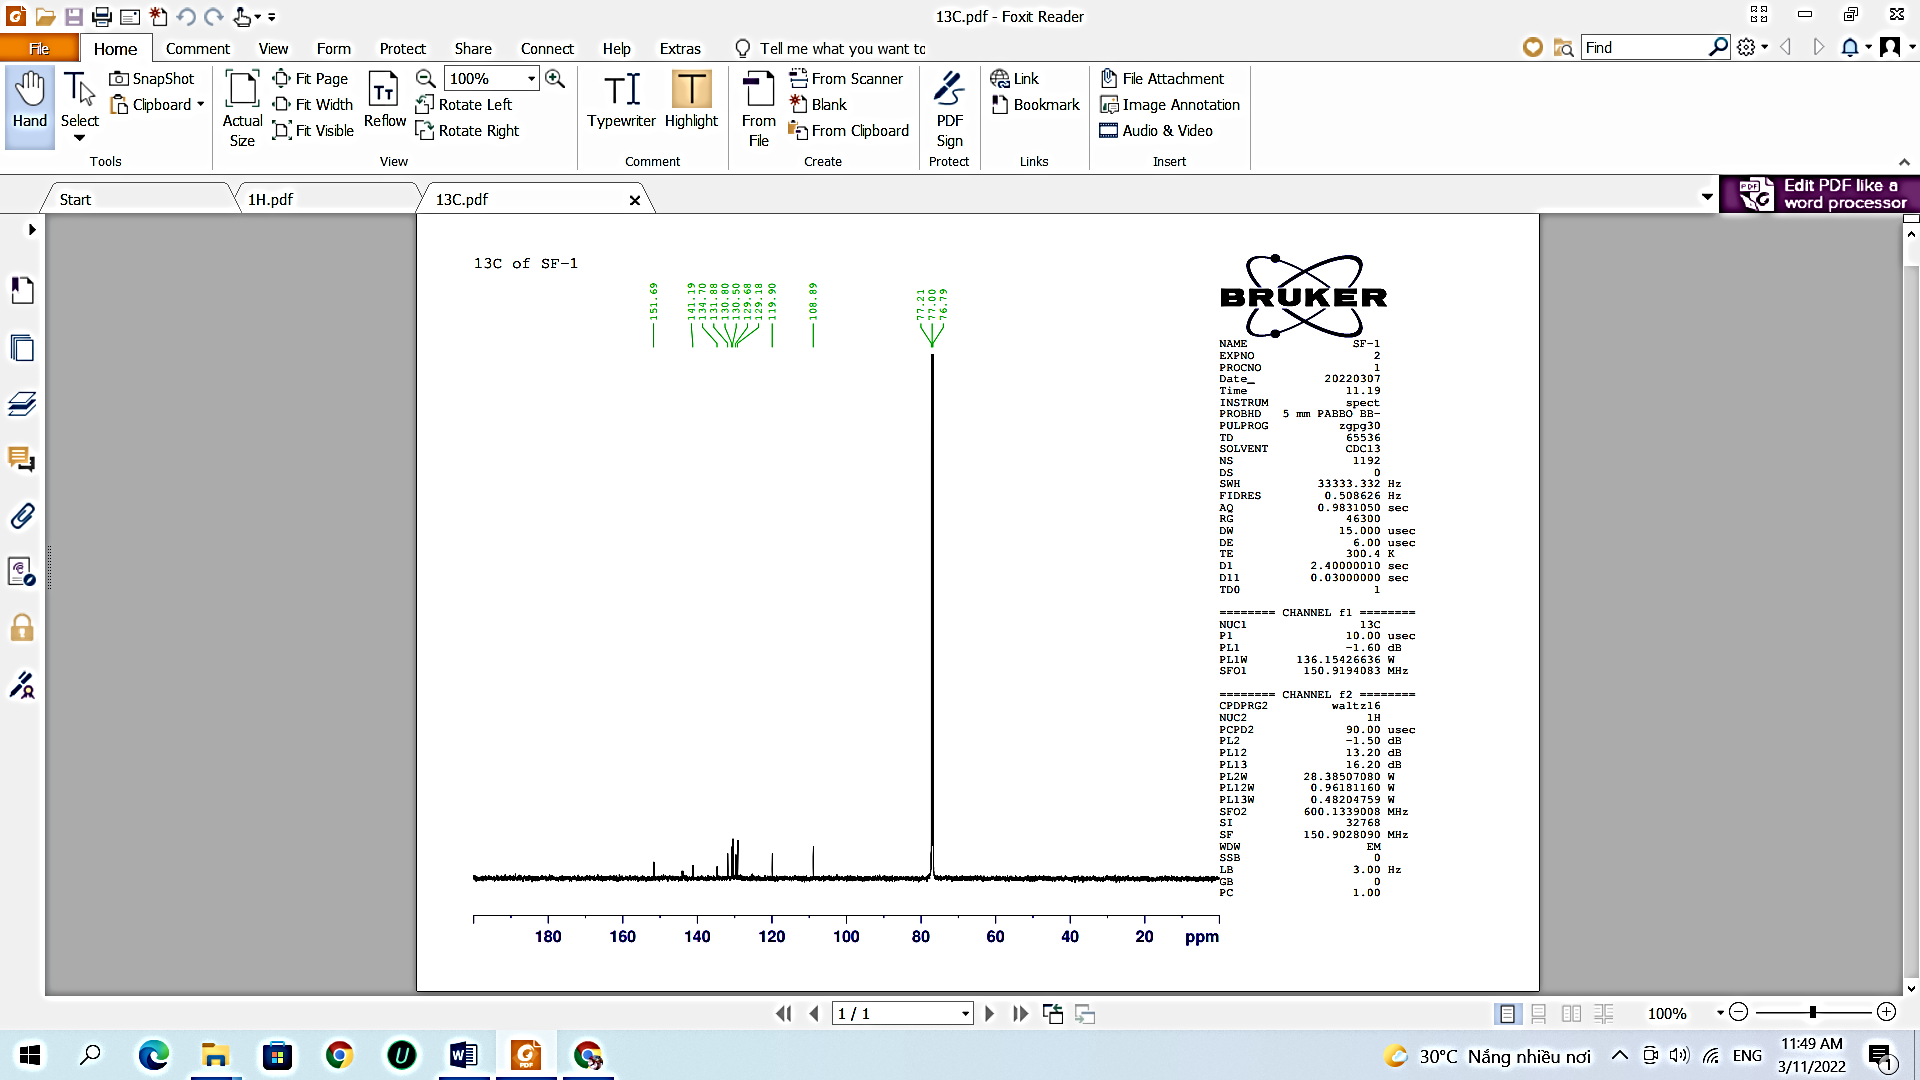


**Figure S3.** 13C NMR spectrum of compound SF-1, measured in CDCl3 at 151 MHz.


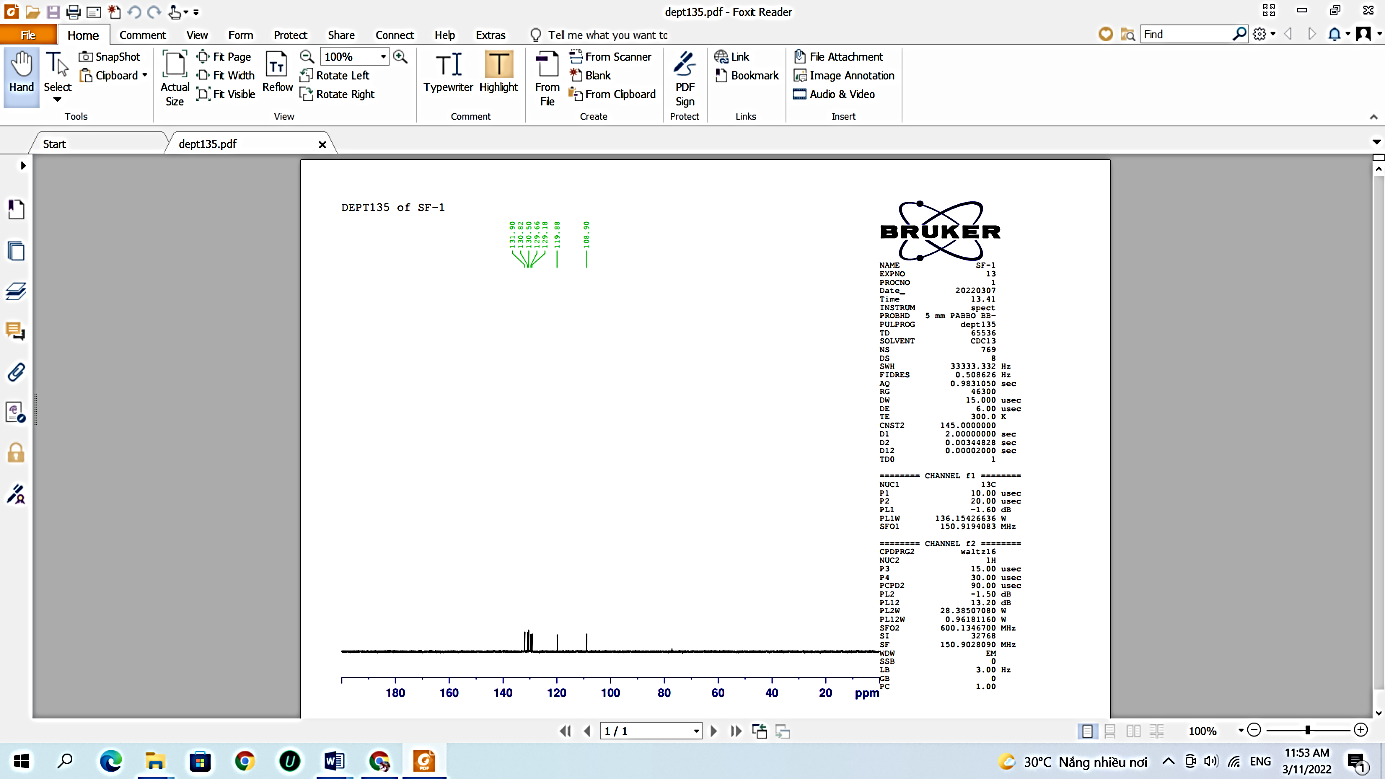


**Figure S4.** DEPT 135 spectrum of compound SF-1, measured in CDCl3 at 151 MHz.


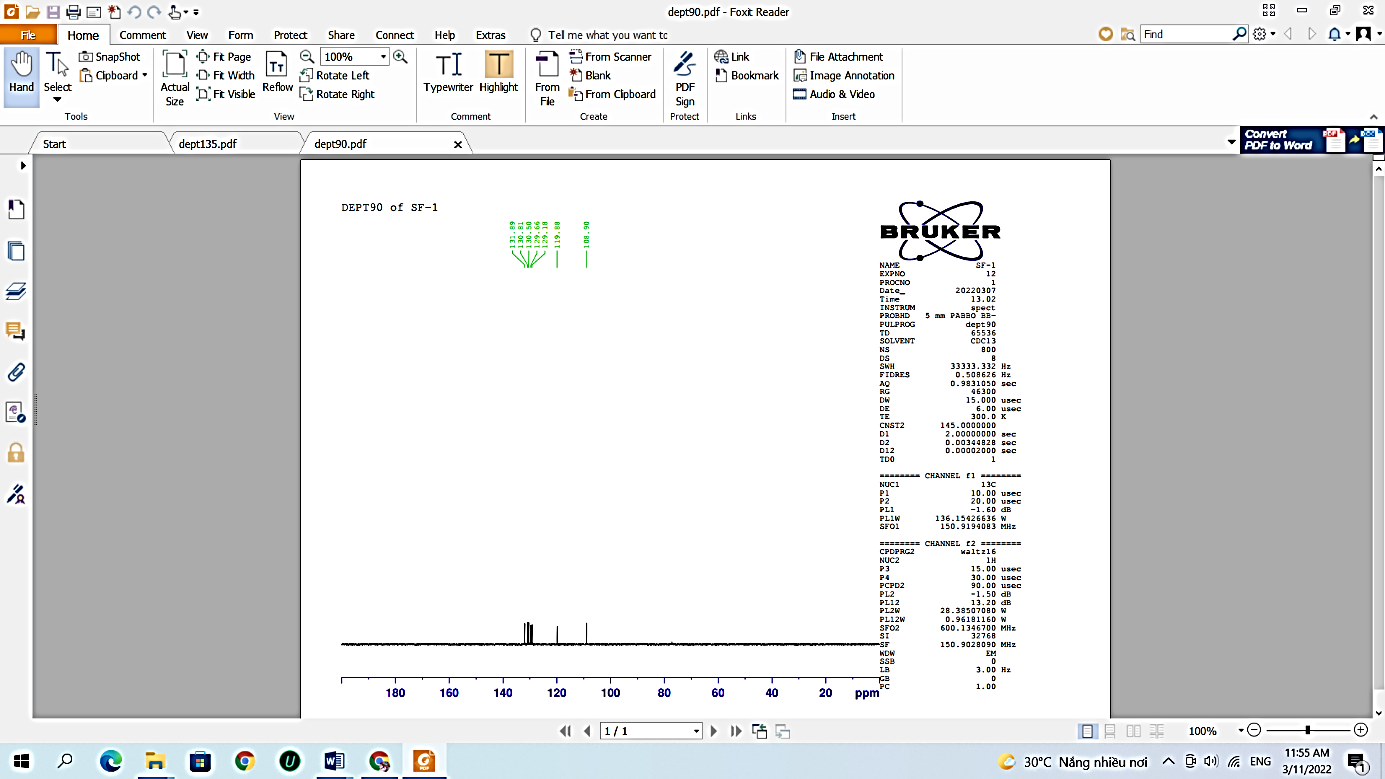


**Figure S5.** DEPT 90 spectrum of compound SF-1, measured in CDCl3 at 151 MHz.


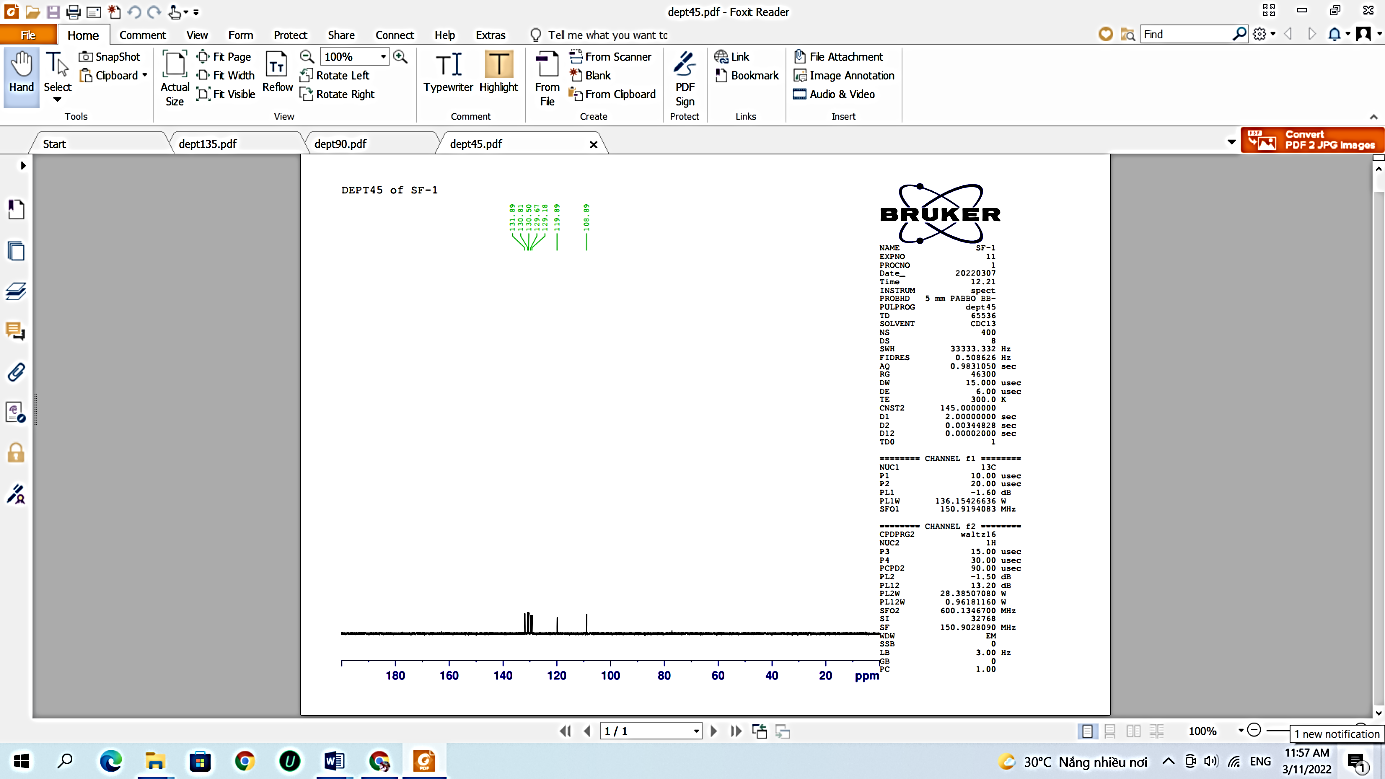


**Figure S6.** DEPT 45 spectrum of compound SF-1, measured in CDCl3 at 151 MHz.
